# Supplementary material for: Structural Insights into Bunyavirus Replication and Its Regulation by the vRNA Promoter
Source: PubMed Central journal article supplement — Cell. 2015 Jun 4;161(6):1267–79. doi: 10.1016/j.cell.2015.05.006 (PMC4459711; doi:10.1016/j.cell.2015.05.006), 2015-06-04
Supplement: mmc1.pdf [file mmc1.pdf]

Cell

Supplemental Information

**Structural Insights into Bunyavirus Replication  
and Its Regulation by the vRNA Promoter**

Piotr Gerlach, H el ene Malet, Stephen Cusack, and Juan Reguera

## Supplemental Experimental Procedures

### Protein Production and Crystallisation

The L protein sequence of the La Crosse virus strain LACV/mosquito/1978 (GenBank: EF485038.1, UniProt: A5HC98) was used to design a synthetic, codon-optimized gene also coding for an N-terminal His-tag followed by Tobacco Etch Virus (TEV) protease cleavage site (MGHHHHHH<sub>6xHis-tag</sub>DYDIPTTENLYFQ<sub>TEV</sub>G) (DNA 2.0). L protein construct 1-1750 (L<sub>1750</sub>) was found by limited trypsin digestion of purified full-length L, its C-terminus also corresponding to boundaries of soluble domains identified by ESPRIT ((Yumerefendi et al., 2010)(data not shown).

L<sub>1750</sub> was expressed in Hi5 insect cells using the Bac-to-Bac expression system with a pFastBac vector. Cells were collected by centrifugation, re-suspended in lysis buffer (50mM Tris-HCl, 500 mM NaCl, 20 mM imidazole 0.5 mM TCEP, pH 8) supplemented with protease inhibitors (Roche, complete mini, EDTA-free), and lysed by sonication. Cell lysate was clarified by centrifugation for 1 h at 35,000 g and further purified by precipitation with NH<sub>4</sub>SO<sub>4</sub> at 0.5 g/ml lysate. The protein fraction was pelleted by 30 min centrifugation at 70,000 g and re-suspended in lysis buffer. After a final clarification step (30 min at 70,000 g), the polymerase was purified from the supernatant by sequential nickel ion affinity, heparin affinity and size exclusion chromatography (Fig. S1A).

L<sub>1750</sub> protein at 5 mg/ml concentration in 20 mM Tris-HCl at pH 8, 150 mM NaCl, 2 mM TCEP, was mixed in 3:4 ratio with an equimolar mixture of nucleotides 1-16 from the 3' vRNA end (3'-UCAUCACAUGAUGGUU-5') and nucleotides 9-16 from the 5' vRNA end (5'-GCUACCAA-3'), which had been pre-annealed. All oligonucleotides were purchased from Dharmacon -GE Healthcare. Brush-like clusters of needles emerged after 2-3 days from several conditions containing 15% (w/v) of PEG 4000 or 20% (w/v) of PEG 3350 as precipitant and 0.2 M of various sulphate or citrate salts. After an additive screen and pH and

precipitant/salt concentration optimization, the optimal conditions were found to be 0.1 M Hepes, 0.2 M sodium citrate tribasic dihydrate, 0.3 M ammonium sulphate, 15% PEG 3350, pH 7. Microseeding allowed production of rod-shaped single crystals suitable for data collection. Seleno-methionine derivative crystals were grown in the same conditions as native ones, using initially native seeds and then switching to seleno-methionine seeds. Heavy metal derivatives were prepared by soaking native crystals in mother liquor supplemented with either 2.5-5 mM  $K_2PtCl_4$  for 1-2 hours, or with 5-10 mM  $Ta_6Br_{12}$  tantalum cluster (Jena Bioscience) for 1-2 days which turned the crystals green. Crystals containing the 5' genomic end were obtained by soaking  $L_{1750}$ -vRNA crystals with 5' nucleotides 1-8, 1-10, 1-11 and 1-12 (5'-pAGUAGUGUGCUA-3' and shorter).

### **Data Collection, Structure Solution and Model Building**

All datasets were collected on ID23-1 and ID29 beamlines at ESRF. Data were integrated and scaled with XDS (Kabsch, 2010).

$L_{1750}$ -vRNA complexes crystallize in the  $P2_12_12_1$  space group ( $a=102.5$ ,  $b=141.0$ ,  $c=165.5$  Å) with one complex per asymmetric unit and 60 % solvent and diffract up to 2.7 Å resolution. To obtain experimental phases optimised anomalous datasets from platinum, tantalum and selenomethionine derivatives were collected at 4.8, 4.2-4.4 and 3.5 Å resolution, respectively (Fig. S1B-D).

The structure was finally solved by first using a highly redundant, 5 Å resolution Ta dataset, measured at the absorption peak, from which four sites for tantalum clusters were localized in a SAD experiment using autoSHARP (Vonrhein et al., 2007). This substructure was then refined and improved using the multiple isomorphous replacement with anomalous signal (MIRAS) method with SHARP (Bricogne et al., 2003), using the same dataset at 4.2 Å resolution, another dataset measured at the Ta inflection point at 4.4 Å from the same crystal, SeMet derivative data measured at the Se absorption peak, 5 mM platinum soaked crystals at

the Pt absorption peak and native data at 2.85 Å resolution. After several rounds of refinement and sites detection by anomalous difference maps, 16 tantalum cluster, 9 platinum sites and 53 selenium sites, were found, leading to an interpretable map at 2.85 Å resolution. LACV endonuclease (PDB: 2XI5) and influenza polymerase PA and PB1 subunits (PDB: 4WSB) could be fitted into the map as a guide to model building (Fig. S1E). The rest of L<sub>1750</sub>-vRNA complex model was iteratively built with COOT (Emsley and Cowtan, 2004) and refined with REFMAC (Murshudov et al., 1997), using selenomethionine positions from the anomalous difference map to help align the sequence. Autobuilding with BUCCANNEER (Cowtan, 2006) was useful to extend the model. The excellent quality of the RNA electron density allowed unambiguous building of co-crystallized vRNA and revealed that the distal short duplex stacks with its exterior blunt end on a neighbouring protein molecule, thus explaining its requirement for crystallisation.

Native L<sub>1750</sub>-vRNA crystals soaked with the 5' genomic ends diffracted to the following resolutions: 5'p1-8 –3.0 Å, 5'p1-10 –3.0 Å, 5'p1-11 –3.1 Å and 5'p1-12–2.8 Å. All showed extra 5' RNA density (Fig. 4A) except that with 5'p1-12.

Structure figures were drawn with Pymol (DeLano, 2002).

## **Electron Microscopy**

Purified L<sub>1750</sub> was initially checked for homogeneity by negative stain electron microscopy. 4 µl of 0.02 mg/ml of sample was applied to the clear side of carbon on a carbon-mica interface and stained with 1% (wt/vol) sodium silico-tungstate pH 7.5. Images were recorded under low-dose conditions with a JEOL 1200 EX II microscope at 100 kV using a nominal magnification of 40,000× (Fig. S2A). Homogeneous samples were subsequently used for cryo-EM analysis. For cryo-EM grids preparation, 4µl of polymerase at 0.2mg/ml was applied onto a glow-discharged and pumped quantifoil grid 400 mesh 2/1 (Quantifoil Micro Tools GmbH, Germany), excess solution was blotted during 2 s with a

Vitrobot (FEI) and the grid frozen in liquid ethane. Data collection was performed on a FEI Krios microscope operated at 80 kV. CryoEM micrographs were collected on a Falcon II electron direct detector at a magnification of 138,129 $\times$  and with a binning factor of 2, giving a pixel size of 2.02 Å (Fig. S2B). FEI EPU automatization software was used to collect 6129 micrographs with a defocus between 0.5 and 2  $\mu\text{m}$ , an exposure time of 0.5 s and a dose of  $14\text{e}^-/\text{Å}^2$ . The contrast transfer function (CTF) for each micrograph was determined with CTFIND3 (Mindell and Grigorieff, 2003). The 4646 best micrographs, based on manual inspection and CTF quality, were kept for subsequent image processing. 10,102 particles were manually picked using EMAN boxer (Ludtke et al., 1999) and used for reference-free 2D MSA classification as implemented in IMAGIC (van Heel et al., 1996). The resulting class averages were used for automated particle picking with a procedure based on the Fast Projection Matching algorithm (Estrozi and Navaza, 2008). False positives from the automated picking procedure were discarded after 2D classification in IMAGIC and RELION 1.3 (Scheres, 2012) leading to a 178,983 particle dataset. Class averages of this clean dataset allowed identification of secondary structure elements of the polymerase (Fig. S2C). An initial 3D model was generated by filtering the L<sub>1750</sub>-vRNA crystal structure at 30 Å resolution and refined as implemented in RELION 1.3 autorefine using the cleaned dataset, leading to a map at 8.3 Å resolution (Fig. 2A, Figs. S2D and S2E)(Scheres and Chen, 2012). Subsequently, a similar quality map was obtained by refinement with Relion1.3 of an initial, de novo, 3D model determined with sxviper (<http://sparx-em.org/sparxwiki/sxviper>), using as an input twenty-three 2D class averages obtained with Relion1.3. Local resolution variations were estimated using ResMap (Fig. S2F), identifying regions with lower resolution corresponding to flexible parts of the polymerase (Kucukelbir et al., 2014). In a subsequent 3D classification run, an angular sampling of 3.75° was combined with local angular searches around the refined orientations and led to separation of the dataset into three different subsets,

corresponding to three different states of the polymerase (Fig. 2). The first subset of 90960 particles led to a 9.7 Å resolution EM map which shows only partial density for the endonuclease, depicting its flexibility (Fig. 2B). A second subset containing 43832 particles led to a 9.7 Å resolution reconstruction with improved density in vRBL (Fig. 2C). The third subset containing 44191 particles yielded a map at 9.3 Å resolution which clearly shows that the vRBL is highly flexible (Fig. 2D). Reported resolutions are based on the gold-standard FSC = 0.143 criterion and are calculated without applying any mask. Prior to visualization, all density maps were sharpened by applying a negative B-factor of 900 Å<sup>2</sup>. The crystallographic model of the endonuclease (residues 1-184) and the polymerase core domain (185-1745) were fitted as two rigid bodies into the EM map using Chimera Fit-in-map module (Pettersen et al., 2004).

### **Polymerase-vRNA Binding Studies**

For electrophoretic mobility shift assays (EMSA) (Figs. S3B and S3D) radioactively labelled RNAs were produced by *in vitro* transcription with T7 polymerase (produced in house). For each 10 µl transcription 2 µM DNA oligos were preheated and annealed in order to form double stranded T7 promoter with long overhang being the reaction template. Reactions were carried with ATP/UTP/CTP (Jena Bioscience) and [ $\alpha^{32}$ P]-GTP (PerkinElmer). RNA products were then resolved and purified from urea TBE 15-20 % polyacrylamide gels. For each binding experiment 10 µM of L<sub>1750</sub> in 10 µl buffer (100 mM Tris, 100 mM NaCl, 0.5 mM DPBA (an endonuclease inhibitor), 5 mM  $\beta$ -mercaptoethanol, pH 8) was mixed with radiolabelled RNA and 1 µl of non-specific poly(U) RNA (Sigma). To maintain a similar amount of radioactive RNA in each mixture the volumes added were scaled based on ImageQuant and Geiger counter measurements performed prior to the experiment. Mixtures were incubated at room temperature for several hours and resolved on native TG gels (top and bottom parts of the gel with 10 and 20% polyacrylamide

respectively). Radioactive signal from shifted bands was recorded with a Typhoon and quantified with ImageQuant. In each case the amount of bound RNA was measured with reference to the control RNA of known strong affinity to the protein.

For fluorescence anisotropy measurements (Fig. S3A), 5 nM 25-nucleotide long RNA oligos corresponding to 3' or 5' vRNA (IBA), labelled with fluorescein on the appropriate non-interacting end, in 150  $\mu$ l buffer (100 mM Tris, 150 mM NaCl, pH 8) were titrated with L<sub>1750</sub> in order to obtain 10-15 protein concentration points ranging from 3 nM to 1  $\mu$ M. Fluorescence and fluorescence anisotropy measurements were carried out in quartz cuvettes, using 495 nm excitation and 515 nm emission wavelengths. KaleidaGraph (Synergy Software) was used to evaluate the data and derive dissociation constants.

For proteolysis protection experiments (Fig. S3D), L<sub>1750</sub> was incubated at 1 mg/ml with 25-nucleotide long 3' or 5' genomic ends at 1:1 molar ratios and then digested for 1 hour at room temperature with trypsin (1:1000 w/w). Products of digestion were analyzed by various techniques including: SDS-PAGE, western-blot, ESI-TOF-MS, MALDI-TOF-MS, MALDI-TOF-MS with N-terminal acetylation, and N terminal sequencing of protein fragments by Edman degradation.

### **Polymerase Activity Assays**

L<sub>1750</sub> or full length L protein and synthetic RNA of various lengths corresponding to the 3' and 5' vRNA ends (GE Dharmacon) were used. RNAs were preheated to 90°C prior to the reaction and, depending on the approach, added either sequentially or simultaneously (as pre-annealed) to the protein sample. The replication assays were done in 10  $\mu$ l aliquots mixing 0.5  $\mu$ M of L-protein, 0.5  $\mu$ M of 3' RNA with or without 0.5  $\mu$ M 5' RNA, 0.5 mM UTP/ATP/GTP/CTP mixture (Jena Bioscience) and [ $\alpha$ 32P]-UTP (PerkinElmer), in 20 mM Tris, 150 mM NaCl, 5 mM MgCl<sub>2</sub>, pH 8, and incubated at 30°C for 2-4h. Reaction products were loaded on urea TBE 15-20 % polyacrylamide gels. The auto-radiographs showed very

weak product bands with none corresponding to the template length as would be expected for a replication product. Products only few nucleotides longer than the 3' RNA template used in the reaction were frequently observed. In most cases the control reaction containing only the radioactive UTP led to the same output as reactions containing all four NTPs, suggesting non-templated nucleotide addition. The presence of regulatory 5' RNA end affected the output of the reactions, not making however the experiment less ambiguous (data not shown). The inconclusive polymerase activity suggests that other viral (e.g. NP) or cellular factors might be essential for its proper function.



**Table S1. Crystallographic Data Collection and Refinement Statistics**

|                                      | Native_1                                              | SeMet_Pk                                              | Ta6Br12_Pk                                            | Ta6Br12_Ip                                            | Pt_Pk                                                 | Native_2                                              | 5' 10 nt soak                                         |
|--------------------------------------|-------------------------------------------------------|-------------------------------------------------------|-------------------------------------------------------|-------------------------------------------------------|-------------------------------------------------------|-------------------------------------------------------|-------------------------------------------------------|
| <b>Data collection</b>               |                                                       |                                                       |                                                       |                                                       |                                                       |                                                       |                                                       |
| Space Group                          | <i>P</i> 2 <sub>1</sub> 2 <sub>1</sub> 2 <sub>1</sub> |
| Cell dimensions                      |                                                       |                                                       |                                                       |                                                       |                                                       |                                                       |                                                       |
| a (Å)                                | 102.09                                                | 102.39                                                | 102.25                                                | 103.00                                                | 104.93                                                | 102.0                                                 | 103.00                                                |
| b (Å)                                | 140.90                                                | 141.07                                                | 140.95                                                | 141.00                                                | 141.25                                                | 140.7                                                 | 141.10                                                |
| c (Å)                                | 162.54                                                | 163.09                                                | 161.97                                                | 163.80                                                | 163.49                                                | 162.4                                                 | 165.50                                                |
| α (°)                                | 90.00                                                 | 90.00                                                 | 90.00                                                 | 90.00                                                 | 90.00                                                 | 90.0                                                  | 90.00                                                 |
| β (°)                                | 90.00                                                 | 90.00                                                 | 90.00                                                 | 90.00                                                 | 90.00                                                 | 90.0                                                  | 90.00                                                 |
| γ (°)                                | 90.00                                                 | 90.00                                                 | 90.00                                                 | 90.00                                                 | 90.00                                                 | 90.0                                                  | 90.00                                                 |
| Resolution (Å)                       | 50 – 2.8                                              | 50 - 3.49                                             | 50-4.2                                                | 50-4.4                                                | 50 – 4.8                                              | 50-2.57                                               | 50-3.0                                                |
| (last shell)                         | (2.9-2.8)                                             | (3.58-3.49)                                           | (4.3-4.2)                                             | (4.5-4.4)                                             | (4.9-4.8)                                             | (2.6-2.57)                                            | (3.12-3.0)                                            |
| Beamline (ESRF)                      | ID29                                                  | ID29                                                  | ID29                                                  | ID29                                                  | ID29                                                  | ID23_1                                                | ID23_1                                                |
| Wavelength (Å)                       | 1.25425                                               | 0.97908                                               | 1.25438                                               | 1.25484                                               | 1.07156                                               | 0.99187                                               | 0.97924                                               |
| Completeness (%)                     | 99.1 (97.4)                                           | 96.9 (95.8)                                           | 99.8 (99.8)                                           | 98.5 (99.3)                                           | 93.2 (93.9)                                           | 94.7 (97.4)                                           | 99.5 (99.5)                                           |
| Redundancy                           | 3.35 (3.28)                                           | 6.94 (6.62)                                           | 13.91 (14.34)                                         | 6.6 (6.66)                                            | 2.3 (2.01)                                            | 3.55 (3.56)                                           | 4.32 (4.52)                                           |
| R-merge                              | 7.9 (66.5)                                            | 25.4 (74.0)                                           | 23 (90.2)                                             | 28.1 (89.9)                                           | 7.0 (57.4)                                            | 8.0 (90.6)                                            | 9.2 (82.1)                                            |
| I/σI                                 | 11.37 (1.93)                                          | 7.48 (2.63)                                           | 10.8 (3.60)                                           | 6.36 (2.56)                                           | 8.11 (2.05)                                           | 11.2 (1.28)                                           | 11.91 (1.55)                                          |
| No. of sites                         | -                                                     | 53                                                    | 16                                                    | 13                                                    | 10                                                    | -                                                     | -                                                     |
| Phasing power acen                   | -                                                     | 7.547                                                 | 3.407                                                 | 3.076                                                 | 1.712                                                 | -                                                     | -                                                     |
| <b>Refinement</b>                    |                                                       |                                                       |                                                       |                                                       |                                                       |                                                       |                                                       |
| Resolution (Å)                       |                                                       |                                                       |                                                       |                                                       |                                                       | 48.65-2.57                                            | 49.2-3.0                                              |
| No. reflections                      |                                                       |                                                       |                                                       |                                                       |                                                       | 71088                                                 | 46142                                                 |
| R <sub>work</sub> /R <sub>free</sub> |                                                       |                                                       |                                                       |                                                       |                                                       | 20.38/25.23<br>(36.6/42.4)                            | 19.23/25.24<br>(35.6/36.9)                            |
| <b>No. residues</b>                  |                                                       |                                                       |                                                       |                                                       |                                                       |                                                       |                                                       |
| Protein                              |                                                       |                                                       |                                                       |                                                       |                                                       | 1657                                                  | 1666                                                  |
| RNA                                  |                                                       |                                                       |                                                       |                                                       |                                                       | 24                                                    | 34                                                    |
| <b>No. atoms</b>                     |                                                       |                                                       |                                                       |                                                       |                                                       |                                                       |                                                       |
| Protein                              |                                                       |                                                       |                                                       |                                                       |                                                       | 13571                                                 | 13618                                                 |
| RNA                                  |                                                       |                                                       |                                                       |                                                       |                                                       | 500                                                   | 716                                                   |
| Water                                |                                                       |                                                       |                                                       |                                                       |                                                       | 92                                                    | -                                                     |
| <b>B-factors (Å<sup>2</sup>)</b>     |                                                       |                                                       |                                                       |                                                       |                                                       |                                                       |                                                       |
| Overall                              |                                                       |                                                       |                                                       |                                                       |                                                       | 69.6                                                  | 89.5                                                  |
| Protein                              |                                                       |                                                       |                                                       |                                                       |                                                       | 67.2                                                  | 90.7                                                  |
| RNA                                  |                                                       |                                                       |                                                       |                                                       |                                                       | 59.2                                                  | 76.9                                                  |
| Water                                |                                                       |                                                       |                                                       |                                                       |                                                       | 59.2                                                  | -                                                     |
| <b>Ramachandran (%)</b>              |                                                       |                                                       |                                                       |                                                       |                                                       |                                                       |                                                       |
| Outliers                             |                                                       |                                                       |                                                       |                                                       |                                                       | 0.1                                                   | 0.3                                                   |
| Favoured                             |                                                       |                                                       |                                                       |                                                       |                                                       | 96.19                                                 | 95.14                                                 |
| RMS deviations                       |                                                       |                                                       |                                                       |                                                       |                                                       |                                                       |                                                       |
| Bond lengths (Å)                     |                                                       |                                                       |                                                       |                                                       |                                                       | 0.003                                                 | 0.007                                                 |
| Bond angles (°)                      |                                                       |                                                       |                                                       |                                                       |                                                       | 0.634                                                 | 1.148                                                 |

**Table S2. Table of Protein-vRNA Hydrogen Bonding Contacts**

| 3' vRNA  |      |         |               |              | 5' vRNA  |      |         |               |              |
|----------|------|---------|---------------|--------------|----------|------|---------|---------------|--------------|
| RNA base | Atom | Residue | Atom          | Distance (Å) | RNA base | Atom | Residue | Atom          | Distance (Å) |
| G        | 14B  | OP2     | Lys 862A NZ   | 2.59 ***     | A        | 1C   | OP2     | Lys 423A NZ   | 3.20 ***     |
| G        | 10B  | O2'     | Lys 381A N    | 2.85 ***     | A        | 1C   | O2'     | Ala 592A N    | 3.09 ***     |
| U        | 9B   | OP1     | Leu 383A N    | 2.94 ***     | A        | 1C   | N3      | Ala 593A O    | 2.63 ***     |
| U        | 9B   | O4      | Arg 526A NH2  | 2.88 ***     | A        | 1C   | N1      | Cys 419A O    | 3.51 *       |
| A        | 8B   | OP1     | Lys 870A NZ   | 3.13 ***     | A        | 1C   | N1      | Cys 419A O    | 3.21 ***     |
| A        | 8B   | O2'     | Arg 526A NH2  | 3.06 ***     | G        | 2C   | OP1     | Arg 595A NE   | 2.95 ***     |
| A        | 8B   | N7      | Ile 378A N    | 3.22 ***     | G        | 2C   | O2'     | Arg 592A NH1  | 2.69 ***     |
| A        | 8B   | N6      | Lys 381A O    | 3.42 *       | G        | 2C   | O2'     | Arg 595A N    | 2.65 ***     |
| C        | 7B   | OP1     | Lys 381A O    | 2.79 ***     | G        | 2C   | O4'     | Arg 595A O    | 2.78 ***     |
| C        | 7B   | O2'     | Lys 1516A NZ  | 2.39 ***     | G        | 2C   | OP2     | Ala 593A O    | 3.14 ***     |
| C        | 7B   | N4      | Trp 395A NE1  | 3.25 ***     | U        | 3C   | O3'     | Lys 302A NZ   | 3.34 *       |
| C        | 7B   | N3      | Gln 398A NE2  | 3.11 ***     | U        | 3C   | O4'     | Arg 600A NH2  | 3.02 ***     |
| C        | 7B   | O2      | Arg 531A NH1  | 2.86 ***     | U        | 3C   | O4'     | Thr 642A OG1  | 3.16 ***     |
| C        | 7B   | OP2     | Arg 531A NH2  | 3.42 *       | A        | 4C   | OP1     | Arg 595A O    | 3.48 *       |
| A        | 6B   | OP1     | Arg 531A NH1  | 3.06 ***     | A        | 4C   | OP1     | Arg 600A NH2  | 2.82 ***     |
| A        | 6B   | OP2     | Tyr 524A OH   | 2.67 ***     | A        | 4C   | OP2     | Thr 642A OG1  | 3.00 ***     |
| A        | 6B   | O5'     | Arg 372A NE   | 3.07 ***     | A        | 4C   | OP2     | Lys 643A N    | 2.96 ***     |
| A        | 6B   | O3'     | Arg 372A NH2  | 3.41 *       | A        | 4C   | OP2     | Thr 642A OG1  | 3.13 ***     |
| A        | 6B   | O2'     | Arg 372A NH2  | 2.86 ***     | A        | 4C   | O2'     | His 761A ND1  | 2.68 ***     |
| A        | 6B   | O2'     | Arg 372A NH2  | 3.49 **      | G        | 5C   | OP1     | Lys 643A NZ   | 2.86 ***     |
| A        | 6B   | N3      | Asn 1308A ND2 | 3.11 ***     | G        | 5C   | O5'     | Tyr 677A OH   | 3.14 ***     |
| A        | 6B   | N6      | Asn 1308A OD1 | 3.52 **      | G        | 5C   | O4'     | His 761A NE2  | 3.49 *       |
| C        | 5B   | OP1     | Asn 1308A ND2 | 3.46 *       | G        | 5C   | N7      | Tyr 677A OH   | 2.94 ***     |
| C        | 5B   | N4      | Ser 520A OG   | 3.51 *       | G        | 5C   | N7      | Lys 679A NZ   | 2.83 ***     |
| C        | 5B   | N3      | Gln 397A OE1  | 3.60 *       | G        | 5C   | N2      | Ser 438A O    | 3.53 *       |
| C        | 5B   | O2      | His 1515A NE2 | 3.35 *       | G        | 5C   | OP2     | Tyr 677A OH   | 2.72 ***     |
| U        | 4B   | O4      | Glu 396A OE1  | 3.26 ***     | U        | 6C   | O5'     | Arg 292A NH2  | 3.37 *       |
| U        | 4B   | O2'     | Gln 397A NE2  | 3.17 ***     | U        | 6C   | O4'     | Gln 291A O    | 3.23 ***     |
| A        | 3B   | N7      | Gln 397A NE2  | 3.58 *       | U        | 6C   | N1      | Gln 291A O    | 3.60 *       |
| A        | 3B   | N6      | Asn 517A ND2  | 2.91 ***     | U        | 6C   | OP2     | Arg 292A NH1  | 3.49 **      |
| A        | 3B   | N6      | Lys 368A NZ   | 3.49 **      | G        | 7C   | N7      | Arg 292A NH2  | 3.26 ***     |
| A        | 3B   | N6      | Asn 318A ND2  | 3.03 ***     | G        | 7C   | N3      | Tyr 1120A OH  | 3.36 **      |
| C        | 2B   | N4      | Lys 323A NZ   | 3.03 ***     | G        | 7C   | N2      | Lys 766A NZ   | 3.16 ***     |
| C        | 2B   | N3      | Cys 535A N    | 3.29 ***     | G        | 7C   | N2      | Gln 1116A NE2 | 3.02 ***     |
| U        | 1B   | O3'     | Lys 472A O    | 2.83 ***     | G        | 7C   | N2      | Gln 1116A OE1 | 3.10 ***     |
| U        | 1B   | O3'     | Lys 472A N    | 3.41 *       | G        | 7C   | N1      | Gln 1116A NE2 | 3.44 *       |
| U        | 1B   | O3'     | Lys 472A O    | 3.42 *       | G        | 7C   | N1      | Asp 1123A OD2 | 2.79 ***     |
| U        | 1B   | O2'     | Pro 314A N    | 3.45 *       | G        | 7C   | N1      | Asp 1123A OD2 | 3.46 *       |
| U        | 1B   | O2'     | Asn 538A ND2  | 2.71 ***     | U        | 8C   | OP1     | Asp 1123A OD1 | 3.22 ***     |
| U        | 1B   | O2'     | Asn 313A O    | 3.18 ***     | U        | 8C   | N3      | Tyr 1120A OH  | 2.92 ***     |
| U        | 1B   | O2'     | Asn 318A OD1  | 3.53 *       | U        | 8C   | O2      | His 761A NE2  | 3.07 ***     |
| U        | 1B   | O2'     | Asn 538A N    | 2.99 ***     | U        | 8C   | O2      | Val 1118A O   | 2.55 ***     |
| U        | 1B   | O2'     | Asn 538A ND2  | 2.85 ***     | U        | 8C   | O2      | Val 1118A N   | 3.01 ***     |
| U        | 1B   | O2'     | Ala 536A O    | 2.75 ***     | U        | 8C   | O2      | Val 1118A N   | 3.00 ***     |
| U        | 1B   | O2'     | Ala 536A O    | 3.19 ***     | U        | 8C   | O4      | Val 1118A O   | 3.26 ***     |
| U        | 1B   | O2'     | Ala 536A O    | 3.57 *       | U        | 8C   | O4      | Val 1118A O   | 3.47 *       |
| U        | 1B   | O2'     | Ala 536A O    | 3.55 *       | U        | 8C   | OP2     | Tyr 1120A N   | 3.21 ***     |
| U        | 1B   | O2'     | His 312A ND1  | 3.56 *       | G        | 9C   | O4'     | His 760A NE2  | 2.61 ***     |
| U        | 1B   | OP2     | Gln 506A NE2  | 3.03 ***     | G        | 9C   | O4'     | His 760A NE2  | 3.13 ***     |
| U        | 1B   | OP2     | Asn 318A ND2  | 3.40 *       |          |      |         |               |              |

## Supplemental References

- Bricogne, G., Vonrhein, C., Flensburg, C., Schiltz, M., and Paciorek, W. (2003). Generation, representation and flow of phase information in structure determination: recent developments in and around SHARP 2.0. *Acta crystallographica Section D, Biological crystallography* *59*, 2023-2030.
- Cowtan, K. (2006). The Buccaneer software for automated model building. 1. Tracing protein chains. *Acta crystallographica Section D, Biological crystallography* *62*, 1002-1011.
- DeLano, W.L. (2002). PyMOL Molecular Graphics System. available online at <http://www.pymol.sourceforge.net>.
- Emsley, P., and Cowtan, K. (2004). Coot: model-building tools for molecular graphics. *Acta crystallographica Section D, Biological crystallography* *60*, 2126-2132.
- Estrozi, L.F., and Navaza, J. (2008). Ab initio high-resolution single-particle 3D reconstructions: the symmetry adapted functions way. *Journal of structural biology* *172*, 253-260.
- Kabsch, W. (2010). Integration, scaling, space-group assignment and post-refinement. *Acta crystallographica Section D, Biological crystallography* *66*, 133-144.
- Kucukelbir, A., Sigworth, F.J., and Tagare, H.D. (2014). Quantifying the local resolution of cryo-EM density maps. *Nature methods* *11*, 63-65.
- Ludtke, S.J., Baldwin, P.R., and Chiu, W. (1999). EMAN: semiautomated software for high-resolution single-particle reconstructions. *Journal of structural biology* *128*, 82-97.
- Mindell, J.A., and Grigorieff, N. (2003). Accurate determination of local defocus and specimen tilt in electron microscopy. *Journal of structural biology* *142*, 334-347.
- Murshudov, G.N., Vagin, A.A., and Dodson, E.J. (1997). Refinement of macromolecular structures by the maximum-likelihood method. *Acta crystallographica Section D, Biological crystallography* *53*, 240-255.
- Pettersen, E.F., Goddard, T.D., Huang, C.C., Couch, G.S., Greenblatt, D.M., Meng, E.C., and Ferrin, T.E. (2004). UCSF Chimera--a visualization system for exploratory research and analysis. *J Comput Chem* *25*, 1605-1612.
- Reguera, J., Cusack, S., and Kolakofsky, D. (2014). Segmented negative strand RNA virus nucleoprotein structure. *Current opinion in virology* *5*, 7-15.
- Reguera, J., Malet, H., Weber, F., and Cusack, S. (2013). Structural basis for encapsidation of genomic RNA by La Crosse Orthobunyavirus nucleoprotein. *Proceedings of the National Academy of Sciences of the United States of America* *110*, 7246-7251.

- Scheres, S.H. (2012). RELION: implementation of a Bayesian approach to cryo-EM structure determination. *Journal of structural biology* *180*, 519-530.
- Scheres, S.H., and Chen, S. (2012). Prevention of overfitting in cryo-EM structure determination. *Nature methods* *9*, 853-854.
- van Heel, M., Harauz, G., Orlova, E.V., Schmidt, R., and Schatz, M. (1996). A new generation of the IMAGIC image processing system. *Journal of structural biology* *116*, 17-24.
- Vonrhein, C., Blanc, E., Roversi, P., and Bricogne, G. (2007). Automated structure solution with autoSHARP. *Methods Mol Biol* *364*, 215-230.
- Yumerefendi, H., Tarendeau, F., Mas, P.J., and Hart, D.J. (2010). ESPRIT: an automated, library-based method for mapping and soluble expression of protein domains from challenging targets. *Journal of structural biology* *172*, 66-74.
